# Supplementary material
Source: publisher site journal article supplement (https://www.dovepress.com/article/507581)
Supplement: Supplementary file 1 [file 507581%20Revised%20Supplementary%20Material.doc]

Supplementary table 1: Change in ETDRS zone retinal nerve fibre layer between baseline and 6 months.

|  | Baseline  Mean ± SD | 6 months  Mean ± SD | Change  Mean (95% CI) | P-value |
| --- | --- | --- | --- | --- |
|  |  |  |  |  |
| Total volume, mm3 | 1.12 ± 0.19 | 0.93 ± 0.13 | -0.18 (-0.24, -0.12) | <0.001 |
|  |  |  |  |  |
| ETDRS sectors, microns | Baseline  Median [IQR] | 6 months  Median [IQR] | Change  Median (95% CI) | P-value |
| Inner nasal | 37 [27, 56] | 21 [20, 24] | -16 (-23, -7) | <0.001 |
| Outer nasal | 52 [45, 55] | 47 [42, 54] | -3 (-5, -2) | <0.001 |
| Inner superior | 34 [27, 42] | 24 [22, 27] | -9 (-12, -4) | <0.001 |
| Outer superior | 40 [36, 45] | 36 [33, 40] | -3 (-6, -2) | <0.001 |
| Inner temporal | 33 [21, 52] | 20 [18, 21] | -14 (-23, -5) | <0.001 |
| Outer temporal | 21 [20, 22] | 22 [20, 24] | 1 (-1, 2) | 0.17 |
| Inner inferior | 34 [27, 41] | 24 [23, 27] | -8 (-16, -2) | <0.001 |
| Outer inferior | 40 [36, 47] | 39 [35, 46] | 0 (-4, 1) | 0.23 |

Supplementary table 2: Change in in peripapillary (PP) RNFL between baseline and 6 months.

| Outcome | Baseline  Mean ± SD | 6 months  Mean ± SD | Change  Mean (95% CI) | P-value |
| --- | --- | --- | --- | --- |
| Global | 95.2 ± 11.9 | 96.0 ± 12.6 | 0.8 (-2.1, 3.5) | 0.58 |
| Sectors |  |  |  |  |
| TS | 130.3 ± 20.8 | 131.2 ± 23.7 | 0.9 (-2.9, 4.7) | 0.64 |
| T | 67.4 ± 13.4 | 67.9 ± 12.5 | 0.5 (-1.9, 2.9) | 0.68 |
| TI | 127.8 ± 19.1 | 126.8 ± 20.4 | -1.0 (-4.0, 2.1) | 0.54 |
| NI | 113.5 ± 21.5 | 118.2 ± 20.0 | 4.4 (0.0, 9.1) | 0.07 |
| N | 75.8 ± 19.7 | 75.6 ± 14.3 | -0.2 (-5.0, 4.6) | 0.93 |
| NS | 103.5 ± 22.9 | 104.8 ± 21.4 | 1.2 (-3.5, 6.0) | 0.59 |

Units microns

TS=temporal-superior, T=temporal, TI=temporal-inferior,NI=nasal-inferior,N=nasal,NS=nasal-superior

Supplementary table 3: Haemorrhages and SANFL associated with forceps pick up points.

|  |  | **Total** | **With SANFL** | **Without SANFL** |
| --- | --- | --- | --- | --- |
| Primary  N=43 | Primary without haemorrhage | 35 (81%) | 6 (14%) | 29 (67%) |
| Primary with haemorrhage | 8 (19%) | 5 (12%) | 3 (7%) |
| Secondary  N=170 | Secondary without haemorrhage | 141 (83%) | 14 (8%) | 127 (75%) |
| Secondary with haemorrhage | 29 (17%) | 18 (11%) | 11 (6%) |

Supplementary table 4: Univariable associations with peripapillary RNFL loss

| Variable | Category | Loss  Mean ± SD | Coefficient  (95% CI) | P-value |
| --- | --- | --- | --- | --- |
|  |  |  |  |  |
| Baseline RNFL (**) | - | - | 2.0 (-0.2, 4.3) | 0.08 |
|  |  |  |  |  |
| Age (*) | - | - | 0.6 (-1.8, 3.1) | 0.61 |
|  |  |  |  |  |
| Sex | Female | -0.8 ± 8.3 | 0 | 0.96 |
|  | Male | -0.6 ± 9.9 | 0.2 (-6.1, 6.4) |  |
|  |  |  |  |  |
| Hole size (****) | - | - | 1.5 (-0.1, 3.2) | 0.07 |
|  |  |  |  |  |
| Vitreo-disc attachment | Not present  Present | -2.2 ±5.8  -0.5 ±8.1 | 0  1.7 (-6.2, 9.5) | 0.67 |
|  |  |  |  |  |
| Duration of symptoms | - | - | -0.1 (-1.3, 1.0) | 0.84 |
|  |  |  |  |  |
| ERM | Not present | 0.4 ± 6.3 | 0 | 0.63 |
|  | Present | -1.1 ± 9.3 | -1.5 (-8.0, 4.9) |  |
|  |  |  |  |  |
| Pick-up points – Total | - | - | 0.3 (-0.9, 1.4) | 0.65 |
| Pick-up points – Inner | - | - | 1.7 (-0.6, 4.0) | 0.15 |
| Pick-up points – Outer | - | - | -0.1 (-1.4, 1.1) | 0.81 |
| Pick-up points – Superior | - | - | -0.9 (-2.6, 0.8) | 0.31 |
| Pick-up points – Temporal | - | - | 1.5 (-0.7, 3.6) | 0.17 |
| Pick-up points – Inferior | - | - | 0.4 (-1.8, 2.6) | 0.69 |
| Pick-up points – Nasal | - | - | 0.7 (-2.2, 3.6) | 0.61 |
|  |  |  |  |  |
| Number SANFL lesions | - | - | 0.1 (-2.0, 2.2) | 0.91 |
|  |  |  |  |  |
| DONFL score (***) (#) | - | - | 5.5 (2.3, 8.7) | **0.001** |
|  |  |  |  |  |
| Forceps | Standard | -1.1 ± 8.8 | 0 | 0.77 |
|  | Sharkskin | -0.3 ± 8.9 | 0.8 (-4.9, 6.6) |  |
|  |  |  |  |  |
| Surgeon | 4 | 1.5 ± 8.2 | 0 | 0.45 |
|  | 3 | -0.2 ± 10.5 | -1.7 (-9.2, 5.8) |  |
|  | 1 | -4.7 ± 6.8 | -6.2 (-14.1, 1.7) |  |
|  | 2 | -0.3 ± 8.4 | -1.9 (-9.8, 6.0) |  |
|  |  |  |  |  |
| Axial length | - | - | 1.0 (-2.0, 4.0) | 0.50 |
|  |  |  |  |  |
| Peel area (*****) | - | - | 2.5 (-1.5, 6.5) | 0.22 |
|  |  |  |  |  |

(*) Regression coefficient given for a 5-year increase in age.

(**) Regression coefficient given for a 10-point increase in DONFL score.

(***) Regression coefficient given for a 100 micron increase in hole size.

(****) Regression coefficient given for a 10 mm3 increase in peel area.
